# Supplementary material for: Nuciferine Inhibits Proinflammatory Cytokines via the PPARs in LPS-Induced RAW264.7 Cells
Source: PubMed Central journal article supplement (PMC6222486; doi:10.3390/molecules23102723), 2018-10-22
Supplement: molecules-23-02723-s001.pdf [file molecules-23-02723-s001.pdf]

## Supporting Information

### Nuciferine Inhibits Proinflammatory Cytokines via the PPARs in LPS-Induced RAW264.7

#### Cells

**Chao Zhang**<sup>1,2,†</sup>, **Jianjun Deng**<sup>3,†</sup>, **Dan Liu**<sup>1</sup>, **Xingxia Tuo**<sup>1</sup>, **Yan Yu**<sup>1</sup>, **Haixia Yang**<sup>1,\*</sup>,  
**Nanping Wang**<sup>2,4,\*</sup>

<sup>1</sup> Department of Nutrition and Food Safety, College of Public Health, Xi'an Jiaotong University, Xi'an 710061, China, [zhangchao9277@163.com](mailto:zhangchao9277@163.com) (C.Z.); [liudan940305@163.com](mailto:liudan940305@163.com) (D.L.); [yyyyyy\\_214@163.com](mailto:yyyyyy_214@163.com) (X.T.); [yuyan@mail.xjtu.edu.cn](mailto:yuyan@mail.xjtu.edu.cn) (Y.Y.)

<sup>2</sup> Cardiovascular Research Center, Xi'an Jiaotong University, Xi'an 710061, China

<sup>3</sup> Shaanxi Key Laboratory of Degradable Biomedical Materials, School of Chemical Engineering, Northwest University, Xi'an 710069, China; [dengjianjun@nwu.edu.cn](mailto:dengjianjun@nwu.edu.cn) (J.D.)

<sup>4</sup> The Advanced Institute for Medical Sciences, Dalian Medical University, Dalian 116044, China.

\* Correspondence: [yanghx@xjtu.edu.cn](mailto:yanghx@xjtu.edu.cn) (H.Y.); [nanpingwang2003@yahoo.com](mailto:nanpingwang2003@yahoo.com) (N.P.); Tel.: +86-029-8265-5107 (H.Y.)

† These authors contributed equally to this work.

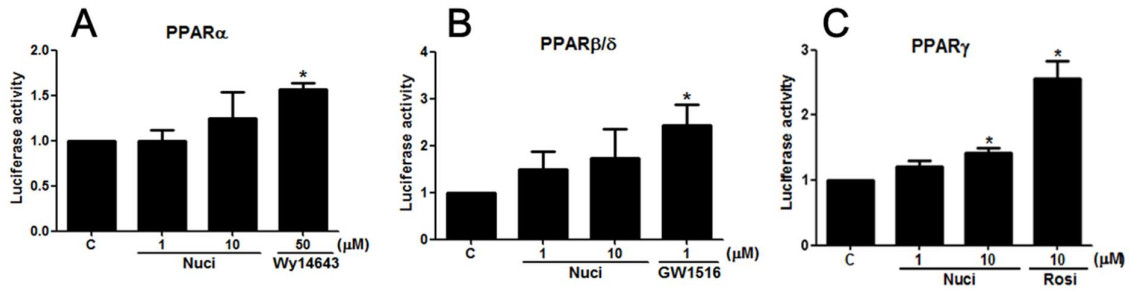

Figure S1. Effect of Nuciferine on PPARs transcription activities in HEK 293 cells.

\*  $p < 0.05$  \*\*  $p < 0.01$  vs. control.

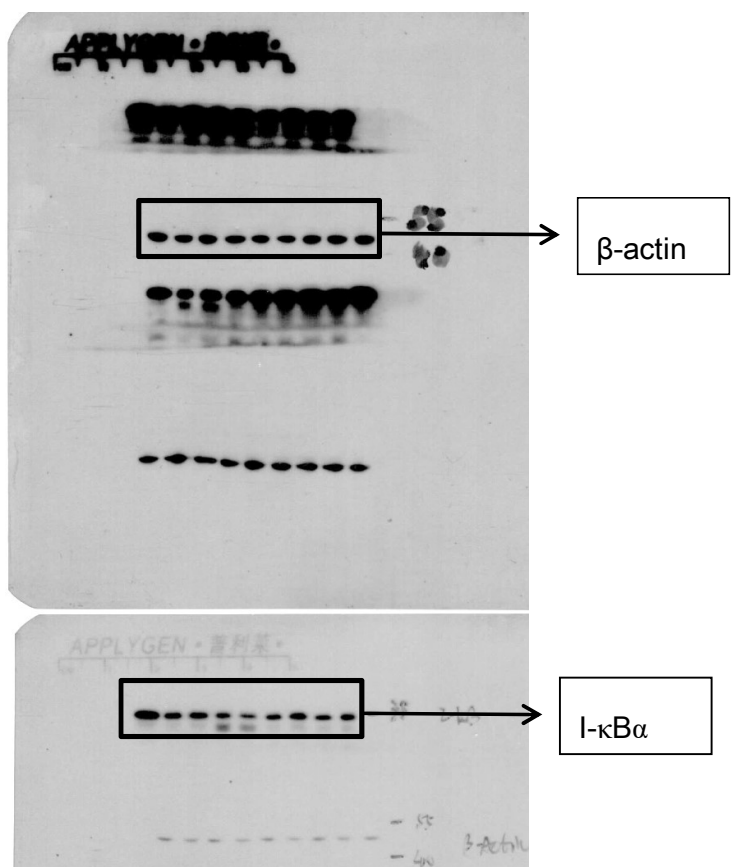

Figure S2. Original western blot films of Figure 5A.

**Table S1.** Sequences of primers for qRT-PCR

| <b>GENE</b>  | <b>Forward Primer (5'-3')</b> | <b>Reverse Primer (5'-3')</b> |
|--------------|-------------------------------|-------------------------------|
| GAPDH        | ACCACAGTCCATGCCATCAC          | TCCACCACCCTGTTGCTRTA          |
| IL-6         | TATGAACAGCGATGACCACTG         | TTGCTCTGAATGACTCTGGCTT        |
| TNF $\alpha$ | TCAGAGGGCCTGTACCTCAT          | GGAAGACCCCTCCCAGATAG          |
| CPT1-A       | CTCAGTGGGAGCGACTCTTCA         | GGCCTCTGTGGTACACGACAA         |
| CD36         | GCCTCCTTTCCACCTTTTGT          | TCTGTACACGGGGATTTCCTT         |
| ADRP         | CTGCTCACGAGCTGCATCATC         | TGTGAGATGGCAGAGAACGGT         |
